# Supplementary material
Source: Springer Nature journal article supplement (https://www.springerprofessional.de/resource/supplementary/13638_2010_26_MOESM6_ESM.pdf/11897384)

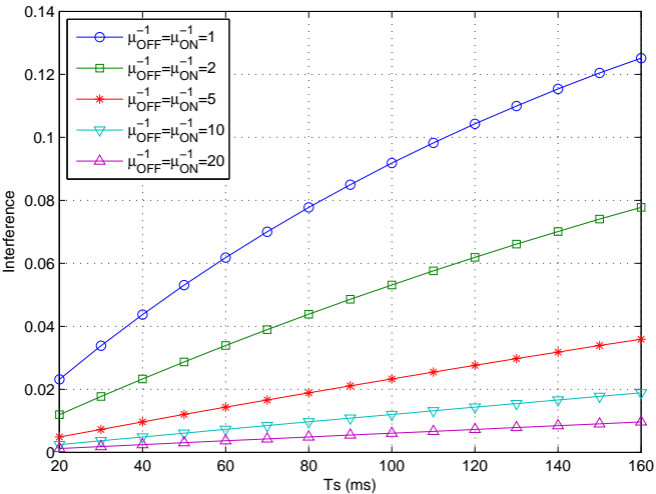

Supplement: MOESM6 [file 11897384]
